**Table S2. Primers used to construct Hyg-HA and Hyg-GFP cassettes for MFT**

| <b>Construct</b> | <b>Sequence (5' to 3')</b>                  |
|------------------|---------------------------------------------|
| <b>Hyg-HA</b>    |                                             |
| SK101            | GGTCATACCTTCTTAAGTTCCG                      |
| SK102            | GGAACATCGTAAGGGTATGCCATTTCTTTGCCCTCGGACGAG  |
| SK103            | CTCGTCCGAGGGCAAAGGAAATGGCATAACCTTACGATGTTCC |
| SK104            | GCTCGGACTGAGATAGGACG                        |
| <b>Hyg-GFP</b>   |                                             |
| hyg-gfp 1        | TATTCTACCGAAGCATCGA                         |
| hyg-gfp 2        | TCCTCGCCCTTGCTCACCATTTCTTTGCCCTCGGACGAGT    |
| hyg-gfp 3        | ACTCGTCCGAGGGCAAAGGAAATGGTGAGCAAGGGCGAGGA   |
| hyg-gfp 4        | GCATGCTTACTTGTACAGCT                        |
