**Table S4. Primers used to construct  $\Delta lah1$ ,  $\Delta lah2D$  and  $\Delta lah-1$ ,  $\Delta lah-2$** 

| <b><i><math>\Delta lah1</math></i></b> | <b>Sequence (5' to 3')</b>                         |
|----------------------------------------|----------------------------------------------------|
| 5' UTR (sal1)f                         | CGGTCGACGCCTTCCTTGGGTTTCG                          |
| 2kb in orf (Ecor1)r                    | GGCGAATTCCTCGGCCAGAACATGGTTGG                      |
| STM not1-f 5'UTR                       | CATACATAGTGTTTAGTATCGCGGCCGCTTACCATACCATCCTAGCCG   |
| STM not1-r 5'UTR                       | CGGCTAGGATGGTATGGTAAGCGGCCGCGATACTAAACACTATGTATG   |
| STM pac1-f ORF                         | GACTCTGACCTTGCCTATGGTTAATTAACACTCAATACTCGGACGAGAAG |
| STM pac1-r ORF                         | CTTCTCGTCCGAGTATTGAGTTAATTAACCATAGGCAAGGTCAGAGTC   |

  

| <b><i><math>\Delta lah2</math></i></b> | <b>Sequence (5' to 3')</b>                    |
|----------------------------------------|-----------------------------------------------|
| test3-1                                | CGCTCTTCCATGTCTGGTGCT                         |
| test3-2                                | CGGTGAGTTCAGGCTTTTTTCATATCATCCTCAAACCTCATCATC |
| test3-3                                | GATGATGAGTTTGAGGATGATATGAAAAAGCCTGAACTCACCG   |
| 31603--4stop                           | CAATCCACCATCCATCAGACAAGTTCGGTCGGCATCTACTC     |
| 31603--5 stop                          | GAGTAGATGCCGACCGAACTTGTCTGATGGATGGTGGATTG     |
| 31603--6                               | TAGACTAGCTAACAAGTTAGG                         |

  

| <b><i><math>\Delta lah-1</math>, <math>\Delta lah-2</math></i></b> | <b>Sequence (5' to 3')</b>                   |
|--------------------------------------------------------------------|----------------------------------------------|
| $\Delta lah-1$                                                     | TCTGCACTAGTGTAACCCAGG                        |
| $\Delta lah-2$                                                     | CGGTGAGTTCAGGCTTTTTTCATTGTTGACCGCTTGGGTATAGG |
| $\Delta lah-3$                                                     | CCTATACCCAAGCGGTCAACAATGAAAAAGCCTGAACTCACCG  |
| 31603--4stop                                                       | CAATCCACCATCCATCAGACAAGTTCGGTCGGCATCTACTC    |
| 31603--5 stop                                                      | GAGTAGATGCCGACCGAACTTGTCTGATGGATGGTGGATTG    |
| 31603--6                                                           | TAGACTAGCTAACAAGTTAGG                        |
