**Table S7. Primers used to construct *lah1*-GFP/RFP/HA and *wsc-CΔ***

| <b><i>lah</i><sup>1-344</sup> GFP (GJP#1812)</b> | <b>Sequence (5' to 3')</b>                        |
|--------------------------------------------------|---------------------------------------------------|
| <i>xba</i> 1-5' <i>lah</i> 1500ORF               | GGCTCTAGAATGATTCCGCGAGACCAACGC                    |
| <i>pac</i> 1-3' <i>lah</i> 1500ORF               | GCCTTAATTAACGCACCAGCAAGCGTTCCCA                   |
| <i>pac</i> 1-stm344 <i>lah</i> f                 | CGGACTCGGACTCGGACTCGTTAATTAACGCGGAAGAGGCCAGCGCTAG |
| <i>pac</i> 1-stm344 <i>lah</i> r                 | CTAGCGCTGGCCTCTTCCGCGTTAATTAACGAGTCCGAGTCCGAGTCCG |

  

| <b><i>lah</i><sup>1-344</sup> RFP/HA</b> | <b>Sequence (5' to 3')</b>           |
|------------------------------------------|--------------------------------------|
| <i>pac</i> 1- <i>rfp</i> ,f              | GGCTTAATTAACATGGTGAGCAAGGGCGAGGAG    |
| <i>ecor</i> 1- <i>rfp</i> .r             | GGCGAATTCTTACTTGTACAGCTCGTCCAT       |
| <i>pac</i> 1- <i>ha</i> .f               | GGCTTAATTAACATGGCATAACCCTTACGATGTTCC |
| <i>ecor</i> 1- <i>ha</i> .r              | GCCGAATTCCTAAGCGTAATCTGGAACGTC       |

  

| <b><i>wsc-CΔ</i></b> | <b>Sequence (5' to 3')</b>                |
|----------------------|-------------------------------------------|
| 3'-Mut-Xba1-1        | CGTCGCCGAAGTGCTTTCTAGACAAAGCGGCGAGGCGCTTC |
| 3'-Mut-Xba1-2        | GAAGCGCCTCGCCGCTTTGTCTAGAAAGCACTTCGGCGACG |
